# Supplementary material for: Cntn4, a risk gene for neuropsychiatric disorders, modulates hippocampal synaptic plasticity and behavior
Source: PubMed Central journal article supplement (PMC7862349; doi:10.1038/s41398-021-01223-y), 2021-02-04

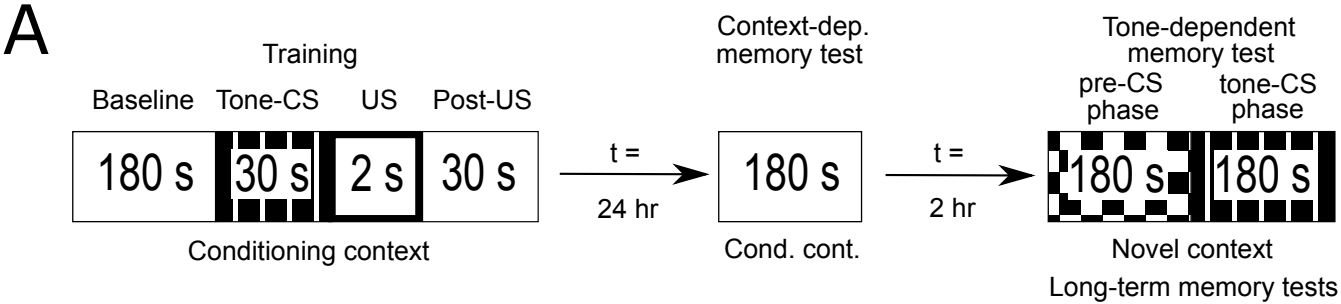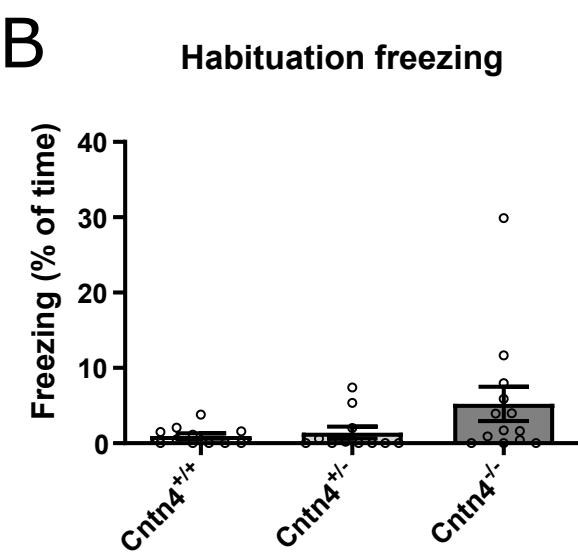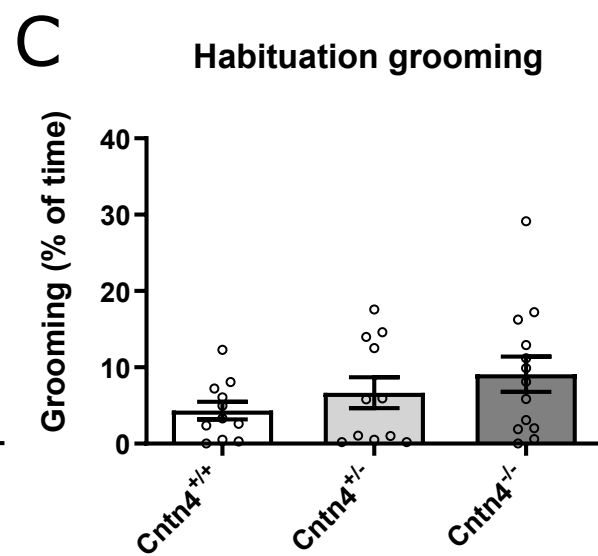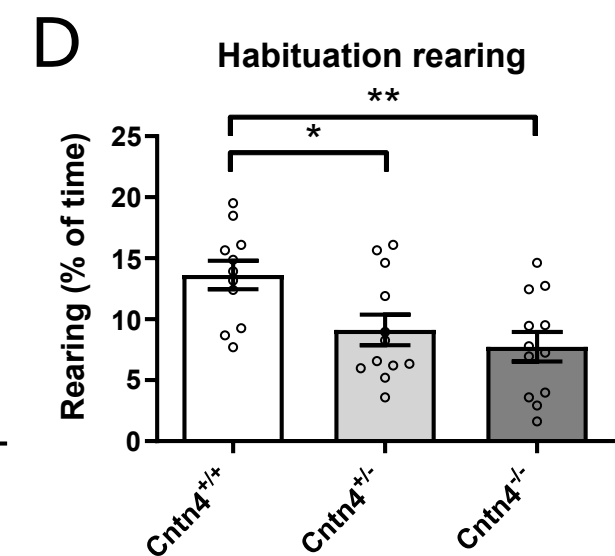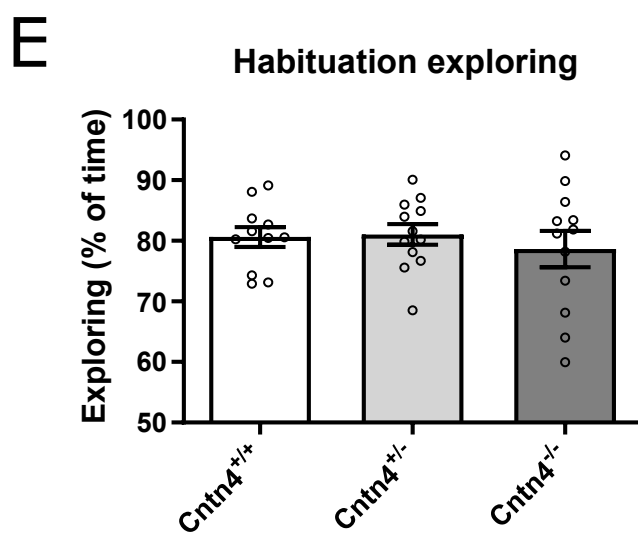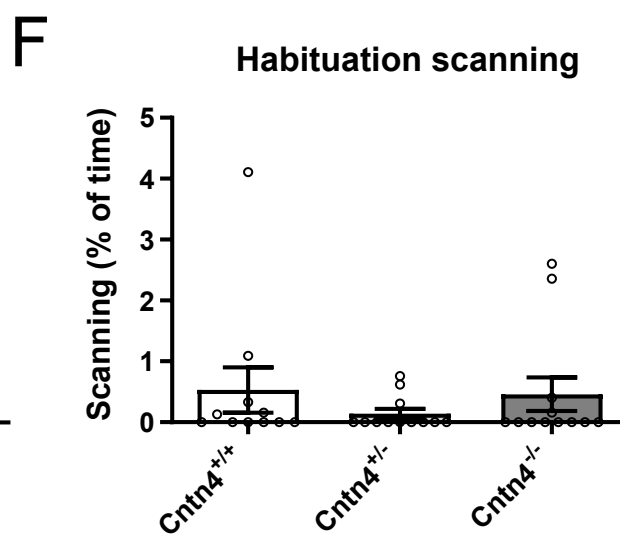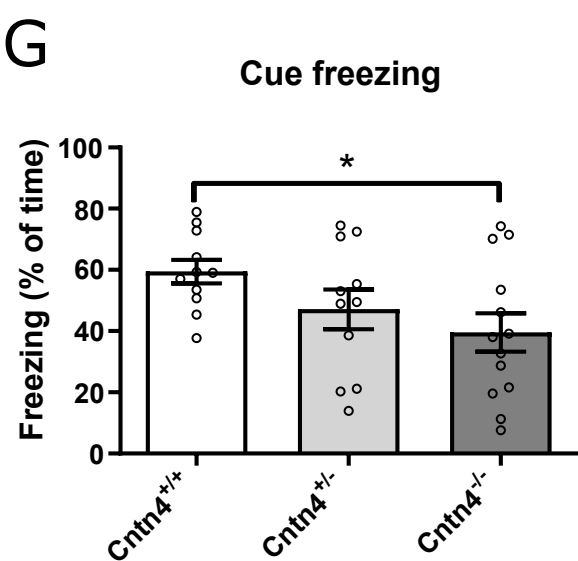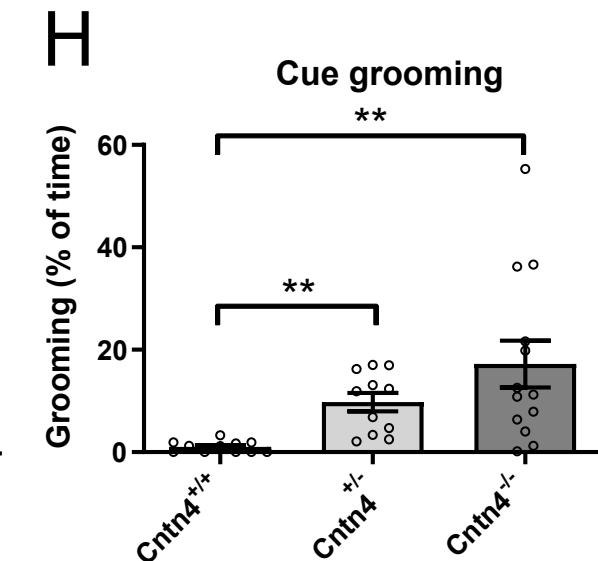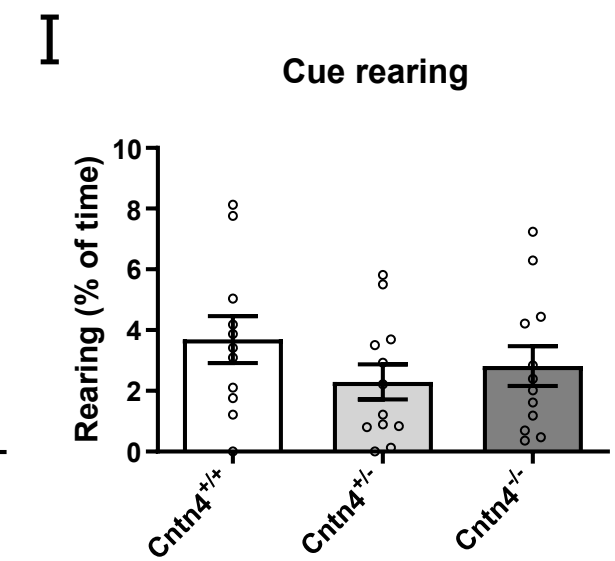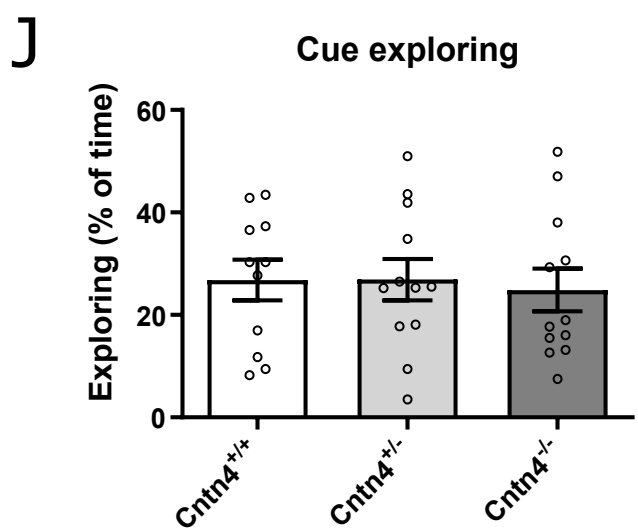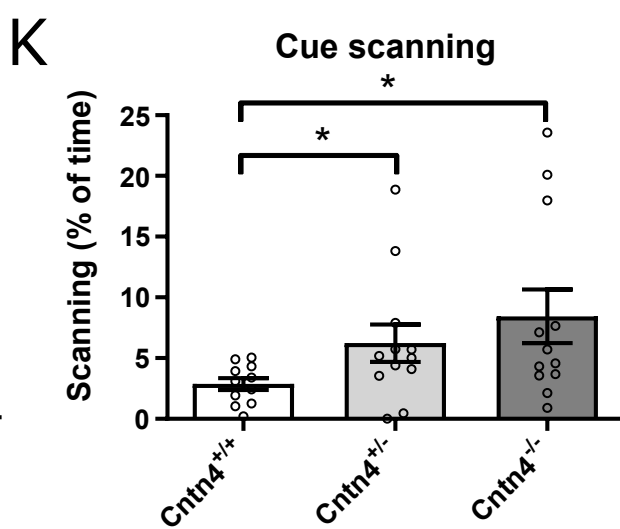

Supplement: 41398_2021_1223_MOESM4_ESM.pdf [file 41398_2021_1223_MOESM4_ESM.pdf]
